# Supplementary material for: Hierarchical Co(OH)2@NiMoS4 nanocomposite on carbon cloth as electrode for high-performance asymmetric supercapacitors
Source: Royal Society of Chemistry journal article supplement (doi:10.1039/d0ra03253k), 2020-01-01
Supplement: d0ra03253k1.pdf [file d0ra03253k1.pdf]

## Supporting Information

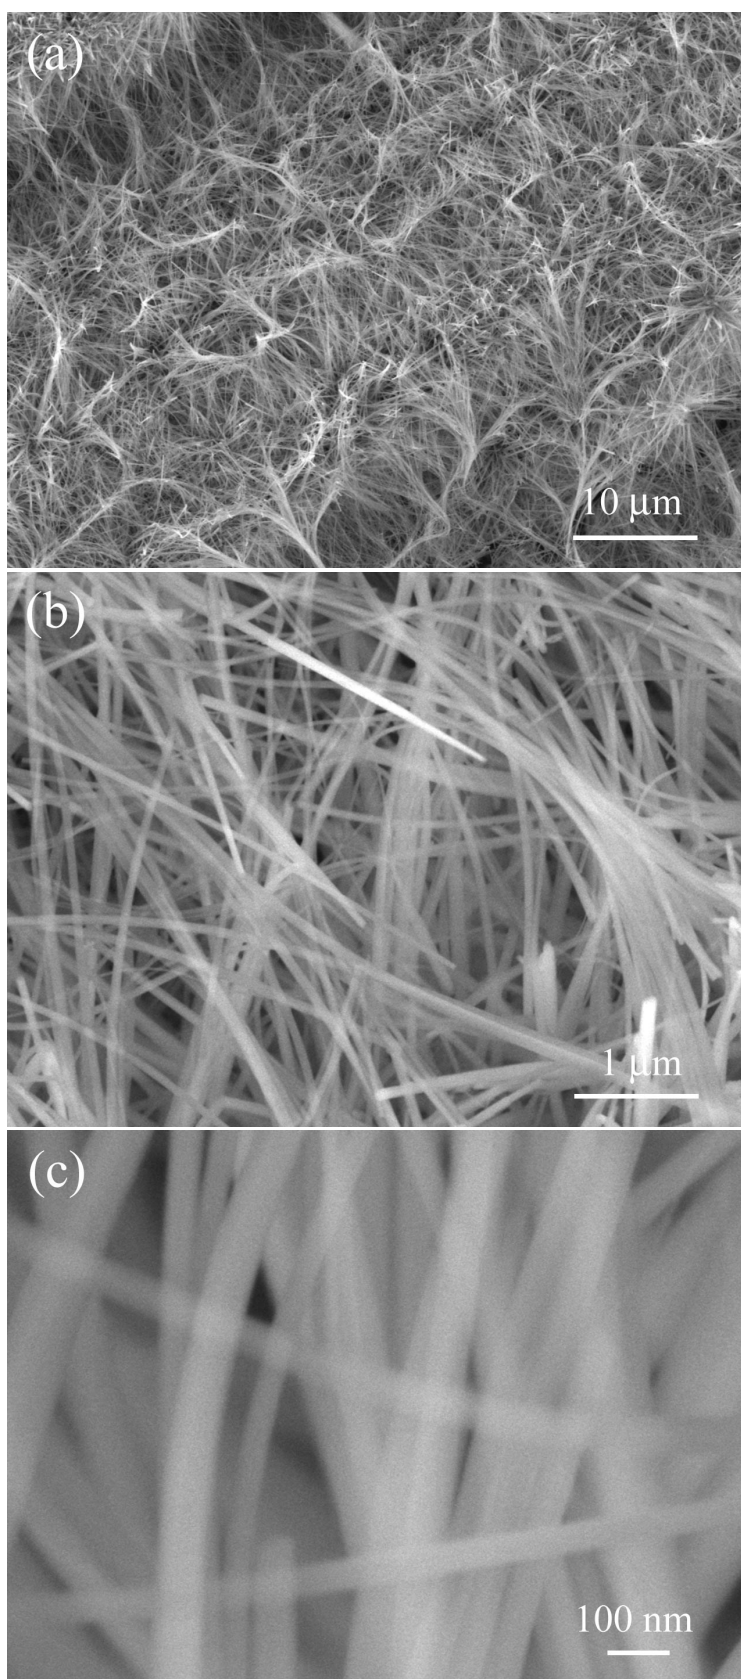

**Figure S1** (a)–(c): SEM images of  $\text{Co(OH)}_2$  nanowires grown on carbon cloth.

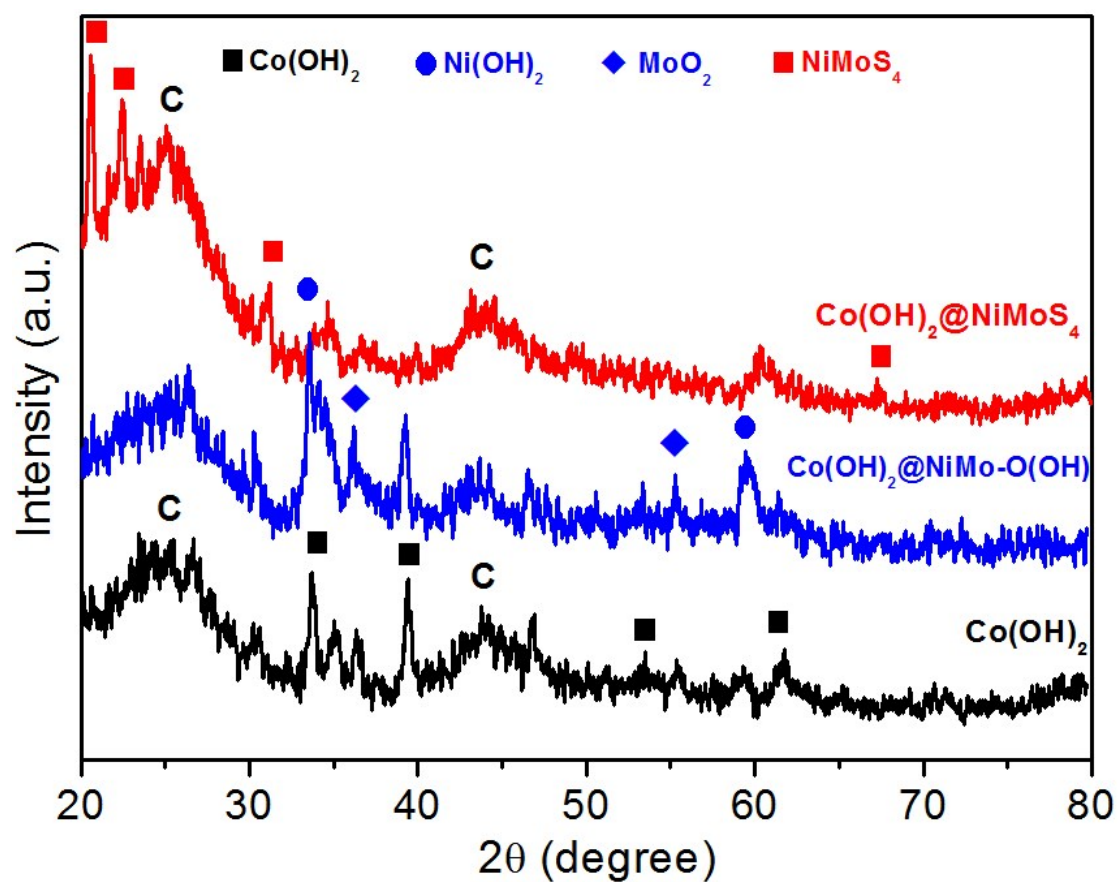

**Figure S2** XRD patterns of the  $\text{Co(OH)}_2$ ,  $\text{Co(OH)}_2\text{@NiMo-O(OH)}$ , and  $\text{Co(OH)}_2\text{@NiMoS}_4$ . Inset:  $\text{Co(OH)}_2$  (JCPDS No. 74-1057),  $\text{Ni(OH)}_2$  (JCPDS No. 73-1520),  $\text{MoO}_2$  (JCPDS No. 78-1071),  $\text{NiMoS}_4$  (Reference JCPDS No. 78-1071).
